# Supplementary material for: Effect of Performance Improvement Programs on Compliance with Sepsis Bundles and Mortality: A Systematic Review and Meta-Analysis of Observational Studies
Source: PubMed Central journal article supplement (PMC4422717; doi:10.1371/journal.pone.0125827), 2015-05-06

**S2 Fig.**

Funnel plot and trim-and-fill analysis of studies that evaluated compliance to individual 6-hour bundle targets. Open circles indicate the analyzed studies, full circles indicate the trimmed studies.

(A) Measure Lactate. The trim-and-fill analysis did not show any obvious publication bias, however the Egger's linear regression test revealed an asymmetry of the funnel plot ( $t = 2.36, p=0.025$ )

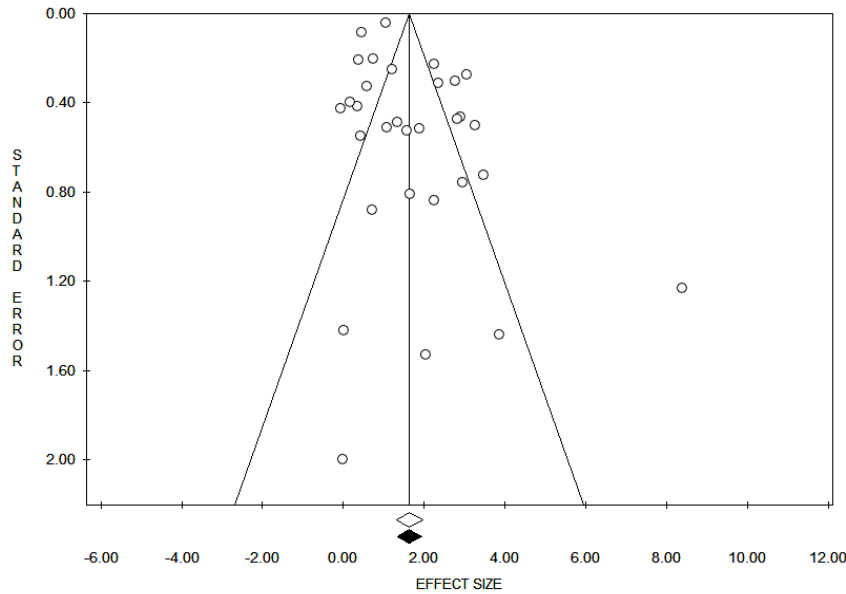

(B) Blood cultures. Trim-and-fill analysis and Egger's linear regression test did not show any asymmetry of the funnel plot.

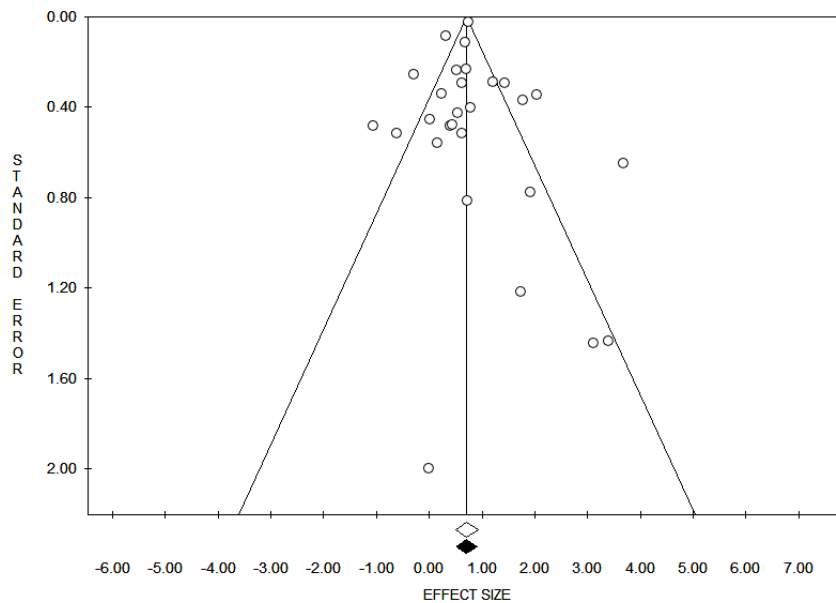

(C) Antibiotics. The trim-and-fill analysis revealed an asymmetry of the funnel plot (estimated ES = 2.06 [1.71-2.48] versus observed ES = 2.22 [1.86-2.66]; number of trimmed studies: 3). The Egger's linear regression test confirmed the possible presence of publication bias ( $t = 2.67, p = 0.012$ ).

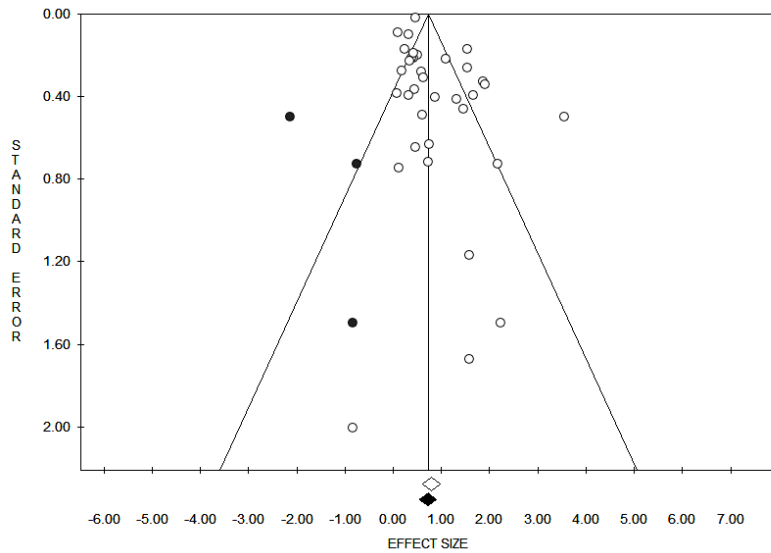

(D) Fluid resuscitation. The trim-and-fill analysis revealed an asymmetry of the funnel plot (estimated ES = 2.33 [1.62-3.35] versus observed ES = 3.22 [2.33-4.46]; number of trimmed studies: 5), although this was not confirmed by the Egger's linear regression test ( $t = 1.57$ ,  $p = 0.130$ ).

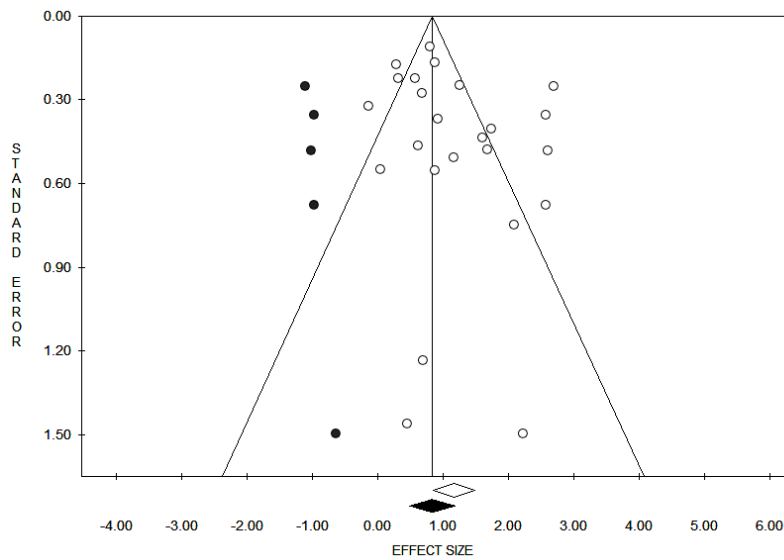

(E) Measure central venous pressure. The trim-and-fill analysis revealed an asymmetry of the funnel plot (estimated ES = 2.48 [1.31-4.68] versus observed ES = 2.77 [1.41-5.46]; number of trimmed studies: 1). The Egger's linear regression test confirmed the possible presence of a publication bias ( $t = 3.96$ ,  $p = 0.007$ ).

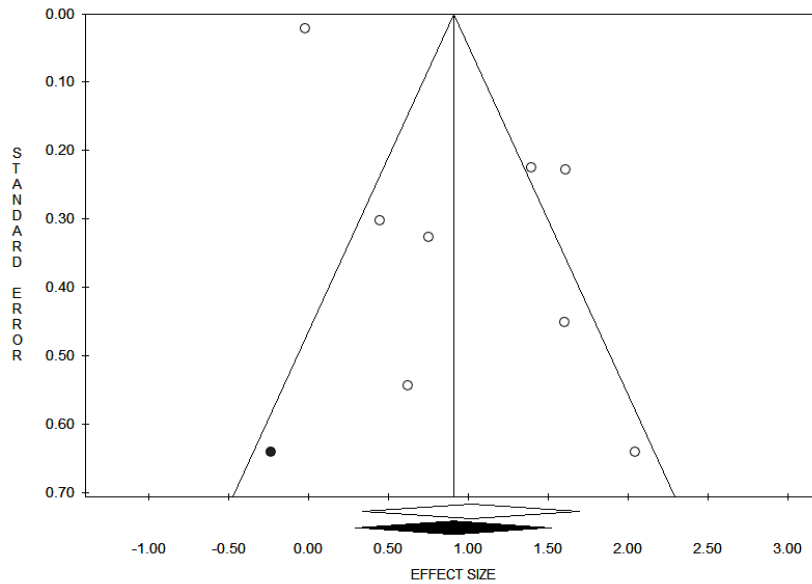

(F) Central venous pressure above 8 mmHg. The trim-and-fill analysis revealed an asymmetry of the funnel plot (estimated ES = 1.79 [1.37-2.33] versus observed ES = 1.91 [1.49-2.45]; number of trimmed studies: 2). The Egger's linear regression test showed a  $t = 1.99$ ,  $p = 0.066$ .

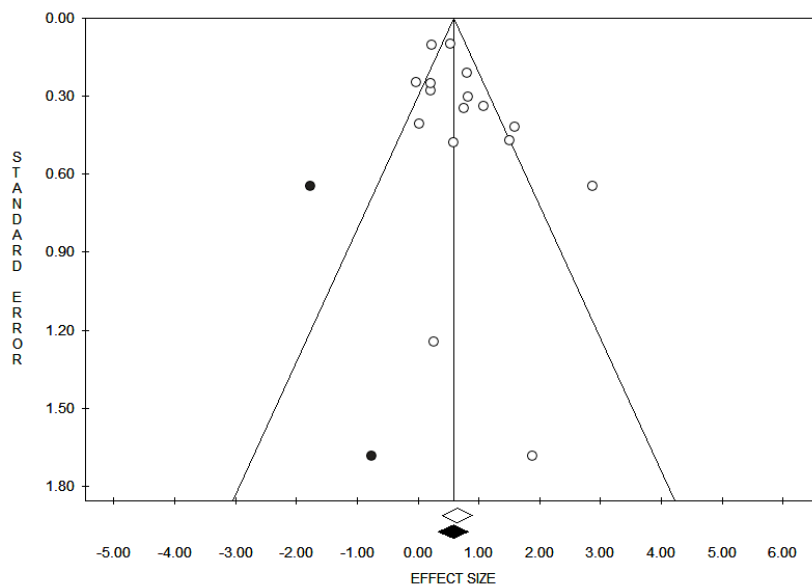

(G) Measure SvO<sub>2</sub>. The trim-and-fill analysis revealed an asymmetry of the funnel plot (estimated ES = 6.33 [3.67-10.92] versus observed ES = 7.08 [4.25-11.80]; number of trimmed studies: 1), although the Egger's linear regression test did not show any obvious publication bias (t = 0.40, p = 0.701).

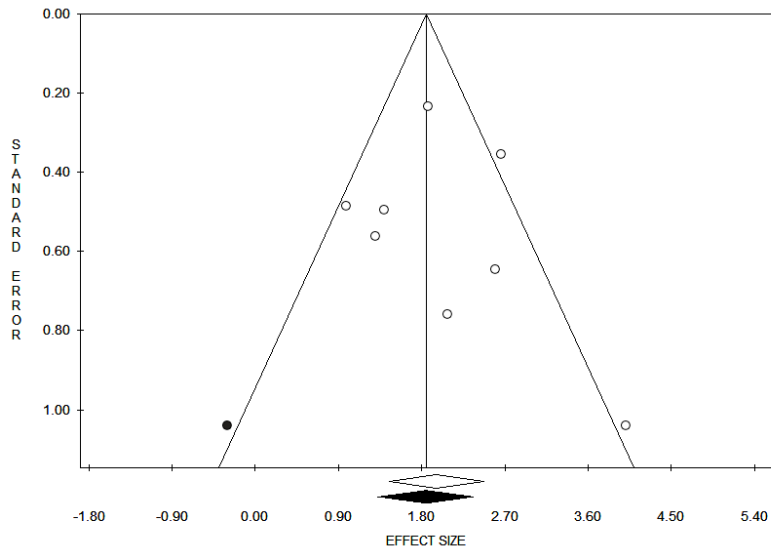

(H) SvO<sub>2</sub> above 70%. Trim-and-fill analysis and Egger's linear regression test (t = 1.90, p = 0.080) did not show any asymmetry of the funnel plot.

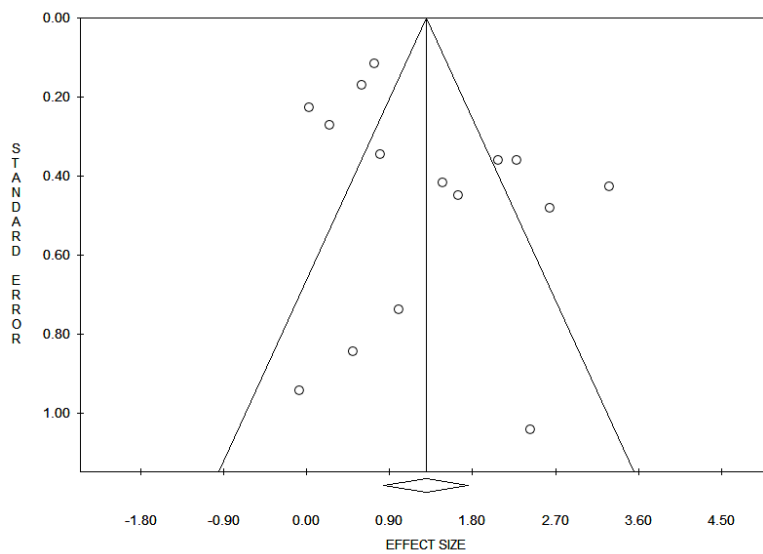

- (I) Mean arterial pressure above 65 mmHg. The trim-and-fill analysis revealed an asymmetry of the funnel plot (estimated ES = 1.48 [0.98-2.25] versus observed ES = 1.55 [1.04-2.32]; number of trimmed studies: 1), although this was not confirmed by the Egger's linear regression test ( $t = 1.25$ ,  $p = 0.252$ ).

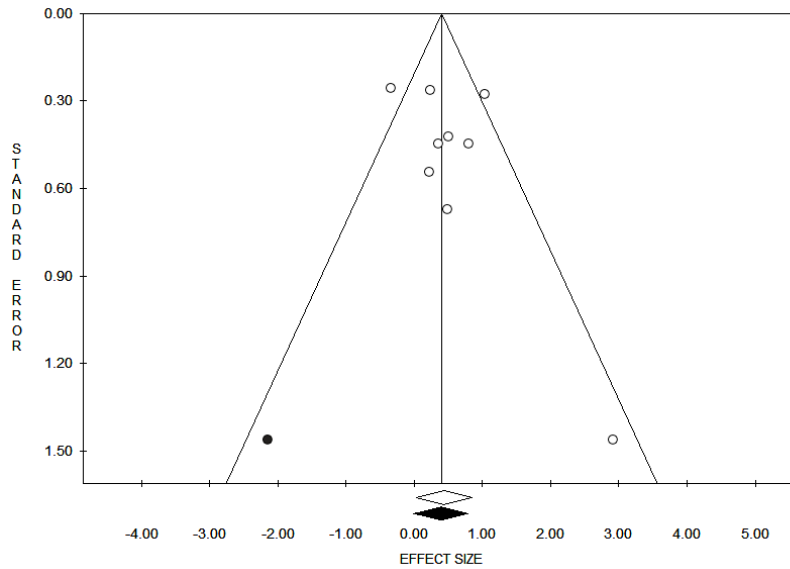

- (L) Use of vasopressors. Trim-and-fill analysis and Egger's linear regression test ( $t = -1.42$ ,  $p = 0.198$ ) did not show any asymmetry of the funnel plot.

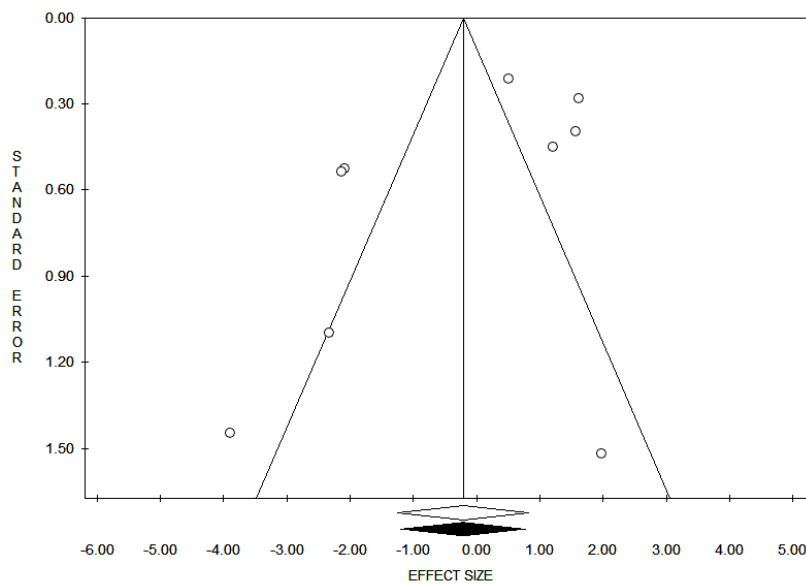

Supplement: pone.0125827.s002.pdf [file pone.0125827.s002.pdf]
