# Supplementary material for: Effect of Performance Improvement Programs on Compliance with Sepsis Bundles and Mortality: A Systematic Review and Meta-Analysis of Observational Studies
Source: PubMed Central journal article supplement (PMC4422717; doi:10.1371/journal.pone.0125827), 2015-05-06

**S3 Fig.**

Funnel plot and trim-and-fill analysis of studies that evaluated compliance to the complete 24-hour sepsis bundle (k = 11). Open circles indicate the analyzed studies, full circles indicate the trimmed studies.

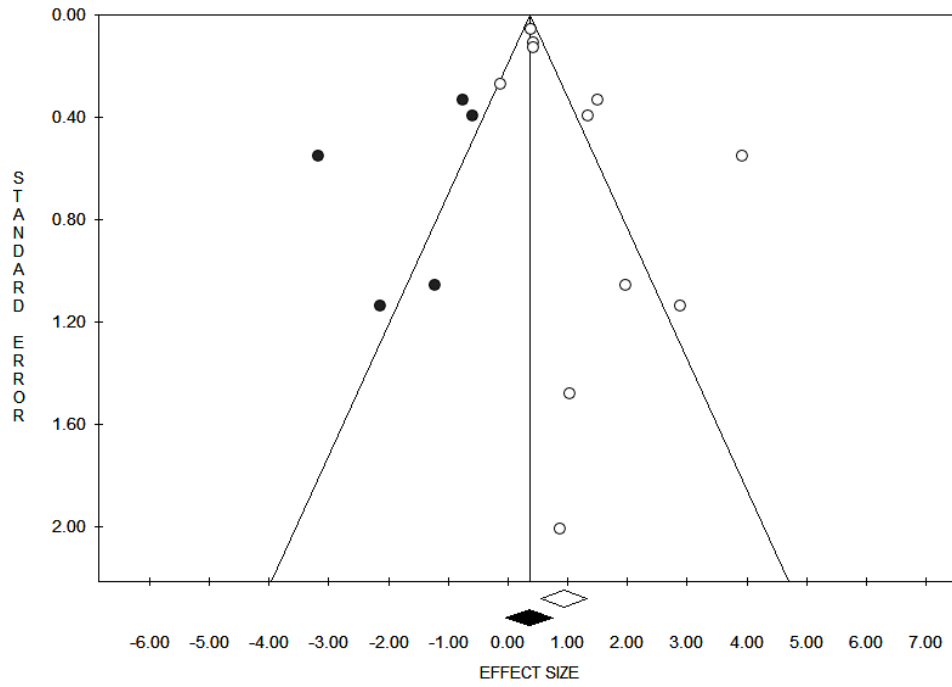

Supplement: pone.0125827.s003.pdf [file pone.0125827.s003.pdf]
