# Supplementary material for: Effect of Performance Improvement Programs on Compliance with Sepsis Bundles and Mortality: A Systematic Review and Meta-Analysis of Observational Studies
Source: PubMed Central journal article supplement (PMC4422717; doi:10.1371/journal.pone.0125827), 2015-05-06

**S4 Fig.**

Funnel plot and trim-and-fill analysis of studies evaluating compliance with individual 24-hour bundle targets. Open circles indicate the analyzed studies, full circles indicate the trimmed studies.

- (A) Lung protective ventilation. The trim-and-fill analysis revealed an asymmetry of the funnel plot (estimated ES = 1.54 [1.00-2.37] versus observed ES = 1.63 [1.07-2.47]; number of trimmed studies: 1). The Egger's linear regression test showed a  $t = 2.19$ ,  $p = 0.065$ .

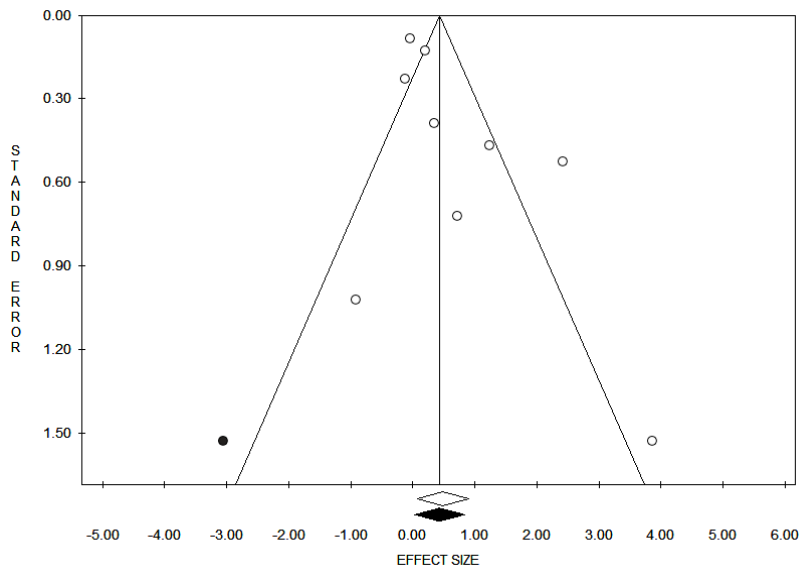

- (B) Low-dose steroids. The trim-and-fill analysis revealed an asymmetry of the funnel plot (estimated ES = 1.48 [1.09-2.01] versus observed ES = 1.77 [1.37-2.29]; number of trimmed studies: 5). The Egger's linear regression test confirmed the possible presence of a publication bias ( $t = 2.66$ ,  $p = 0.016$ ).

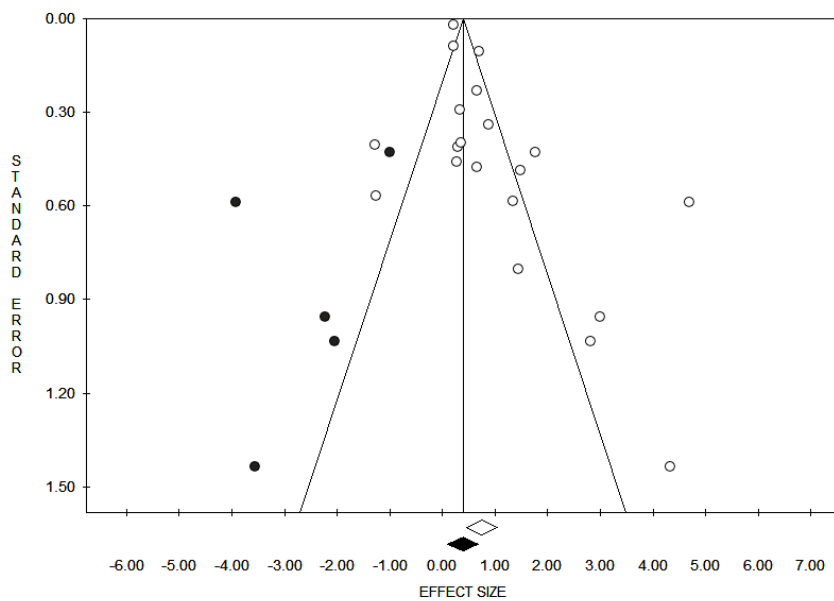

(C) Drotrecogin alfa (activated). Trim-and-fill analysis and Egger's linear regression test ( $t = 2.00$ ,  $p = 0.066$ ) did not show any asymmetry of the funnel plot.

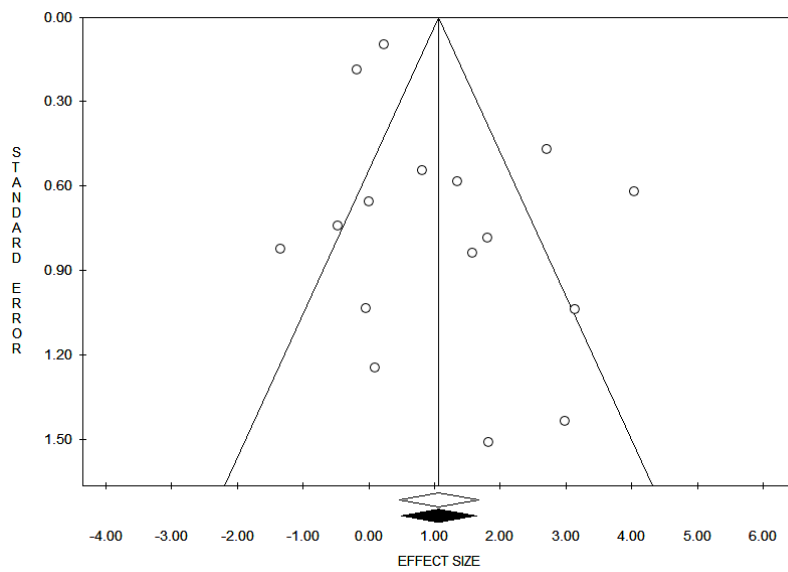

(D) Glucose control. Trim-and-fill analysis and Egger's linear regression test ( $t = 0.51$ ,  $p = 0.621$ ) did not show any asymmetry of the funnel plot.

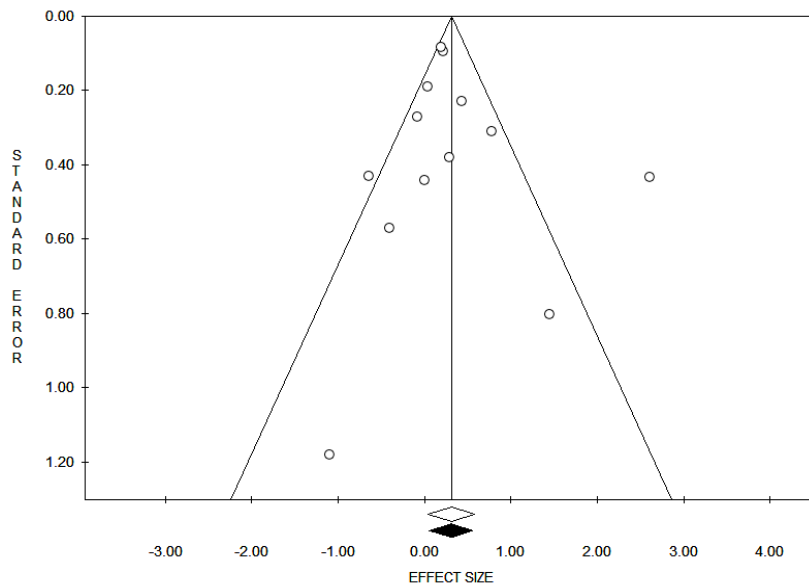

Supplement: pone.0125827.s004.pdf [file pone.0125827.s004.pdf]
