# Supplementary material for: Effect of Performance Improvement Programs on Compliance with Sepsis Bundles and Mortality: A Systematic Review and Meta-Analysis of Observational Studies
Source: PubMed Central journal article supplement (PMC4422717; doi:10.1371/journal.pone.0125827), 2015-05-06

**S5 Fig.**

Funnel plot and trim-and-fill analysis of studies that evaluated mortality ( $k = 48$ ). Open circles indicate the analyzed studies, full circles indicate the trimmed studies. The trim-and-fill analysis revealed an asymmetry of the funnel plot (estimated ES = 0.77 [0.71-0.83] versus observed ES = 0.66 [0.61-0.72]).

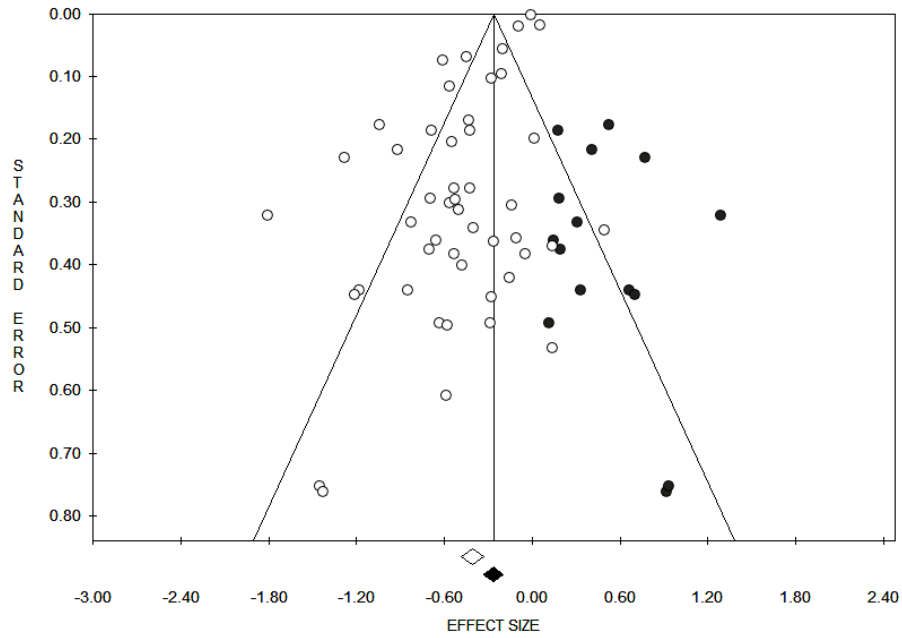

Supplement: pone.0125827.s005.pdf [file pone.0125827.s005.pdf]
