# Supplementary material for: Effect of Performance Improvement Programs on Compliance with Sepsis Bundles and Mortality: A Systematic Review and Meta-Analysis of Observational Studies
Source: PubMed Central journal article supplement (PMC4422717; doi:10.1371/journal.pone.0125827), 2015-05-06
Supplement: pone.0125827.s007.pdf [file pone.0125827.s007.pdf]

## S2 Table

### Study characteristics.

| Study                        | Design                                    | Country | Study period                                 | Setting, teaching/non-teaching center | Sepsis severity                       | Admission | Performance improvement program                                                                                                                 | Type of program | Sample size, total (intervention/control) | Illness severity, mean (intervention/control) | Age, mean years (intervention/control) | H-mortality, mean % (intervention/control) |
|------------------------------|-------------------------------------------|---------|----------------------------------------------|---------------------------------------|---------------------------------------|-----------|-------------------------------------------------------------------------------------------------------------------------------------------------|-----------------|-------------------------------------------|-----------------------------------------------|----------------------------------------|--------------------------------------------|
| Berg 2013 [10]               | retrospective cohort, single-center       | USA     | 2004-2005                                    | H, non-teaching                       | Severe sepsis + Septic shock          | Mixed     | Sepsis response team                                                                                                                            | PC              | 123 (36/87)                               | 26.5 (30.8/24.7)                              | 63 (57.1/65.4)                         | 39.8 (25/43.7)                             |
| Bond 2013 [18]               | retrospective case-control, single-center | Canada  | 2006-2008                                    | ED, teaching                          | Severe sepsis + Septic shock          | -         | Electronic clinical practice guideline                                                                                                          | PC              | 102 (51/51)                               | -                                             | 62 (62/62)                             | 17 (17.7/15.7) [a]                         |
| Cannon 2012 [19]             | historically controlled, multi-center     | USA     | -                                            | H, mixed                              | Severe sepsis + Septic shock          | Mixed     | Sepsis alert, sepsis team, order sets, education, feedback                                                                                      | E + PC          | 5061 (4109/952)                           | -                                             | -                                      | 31.6 (29/43)                               |
| Capuzzo 2012 [20]            | prospective before-after, multi-center    | Italy   | 2003-2007 (pre), 2009 (2nd period post)      | H, mixed                              | Severe sepsis + Septic shock          | Mixed     | Courses and seminars, educational materials                                                                                                     | E               | 333491 (276541/56950)                     | -                                             | 67.7 (67.6-68.5)                       | 6.3 (6.6/6.2)                              |
| Castellanos-Ortega 2010 [21] | historically controlled, single-center    | Spain   | 2004-2005 (pre), 2005-2008 (2nd period post) | ICU, teaching                         | Septic shock                          | Mixed     | Lectures, training sessions, posters, pocket cards; "sepsis profile" for blood tests                                                            | E + PC          | 480 (384/96)                              | 23.5 (23.2/24.6)                              | 64 (64.5/62.2)                         | 41.5 (37.5/57.3)                           |
| Chen 2013 [22]               | retrospective before-after, multi-center  | Taiwan  | 2000-2003 (pre), 2005-2008 (post)            | H, mixed                              | Severe sepsis + Septic shock          | Mixed     | Educational program for intensivists                                                                                                            | E               | 39760 (24858/14848)                       | -                                             | 65 (63.8/65.8)                         | 46.8 (45.9/48.2) [a]                       |
| De Miguel-Yanes 2009 [23]    | historically controlled, single-center    | Spain   | 2005 (pre), 2007 (post)                      | ED, teaching                          | Sepsis + severe sepsis + septic shock | -         | Training for residents, easy-to-read visual tools (flow-charts) for early diagnosis and treatment, creation of a High Dependency Unit in the ED | E + PC          | 103 (50/53)                               | 17.2 (15.9/18.3)                              | 71.3 (70.7/71.8)                       | 20.4 (18/22.6)                             |
| El Solh 2008 [24]            | historically controlled, single-center    | USA     | 2001-2004 (pre), 2004-2007 (post)            | H, teaching                           | Septic shock                          | -         | Training for nurses, residents, physician assistants, sepsis protocol, preprinted order sets                                                    | E + PC          | 174 (87/87)                               | 41 (42/40)                                    | 74.5 (74.6/74.5)                       | 55.7 (54/57)                               |
| Ferrer 2008 [25]             | prospective before-after, multi-center    | Spain   | 2005 (pre), 2006 (post)                      | ICU, mixed                            | Severe sepsis + Septic shock          | Mixed     | Educational program and materials (posters, pocket cards) for physicians and nurses                                                             | E               | 2319 (1465/854)                           | 21.2 (21/21.3)                                | 62.2 (62.1/62.4)                       | 41.2 (39.7/44)                             |

|                        |                                           |           |                                          |                   |                                       |         |                                                                                                   |        |               |                    |                  |                      |
|------------------------|-------------------------------------------|-----------|------------------------------------------|-------------------|---------------------------------------|---------|---------------------------------------------------------------------------------------------------|--------|---------------|--------------------|------------------|----------------------|
| Francis 2010 [26]      | retrospective before-after, multi-center  | Canada    | 2004 (pre), 2006 (post)                  | ED, teaching      | Severe sepsis                         | -       | Screening tool for sepsis, preprinted order sets, educational sessions                            | E + PC | 213 (128/85)  | -                  | 64.1 (62.6/66.4) | -                    |
| Girardis 2009 [27]     | time-series analysis, single-center       | Italy     | 2005 (1st semester), 2007 (5th semester) | ICU, teaching     | Severe sepsis + Septic shock          | Mixed   | Lectures and training, posters, sepsis team                                                       | E + PC | 33 (20/13)    | 9.9 (8.4/12.3) [b] | 62.6 (61/65)     | 48.5 (35/69)         |
| Giuliano 2011 [9]      | prospective before-after, single-center   | USA       | 2006-2008                                | ICU, teaching     | Sepsis + severe sepsis + septic shock | Mixed   | Introduction of a computer application to assist physicians in sepsis diagnosis and treatment     | PC     | 135 (70/65)   | 21.9 (22.3/21.4)   | 68.4 (69.1/67.6) | 32.3 (33/31)         |
| Gurnani 2010 [28]      | prospective before-after, single-center   | USA       | 2006-2008                                | ICU, teaching     | Septic shock                          | -       | Implementation of a SSC-based protocol with educational sessions                                  | E + PC | 118 (54/64)   | 27.5 (27/28)       | 56.9 (52/61)     | 48.3 (38.9/56.5)     |
| Heppner 2012 [29]      | prospective before-after, single-center   | Germany   | 2008-2009                                | ICU, non-teaching | Sepsis + severe sepsis + septic shock | Medical | Implementation of a standardized order set, education and training                                | E + PC | 122 (61/61)   | -                  | 80 (79.7/80.3)   | 49.2 (46.9/53.3)     |
| Hoo 2009 [30]          | retrospective before-after, single-center | USA       | 2007-2008                                | H, non-teaching   | Sepsis + severe sepsis + septic shock | -       | Education, preprinted order sets, feedback                                                        | E + PC | 675 (365/310) | -                  | -                | 22.8 (17.3/29.4)     |
| Jacob 2012 [31]        | prospective before-after, multi-center    | Uganda    | 2006 (pre), 2008-2009 (post)             | H, non-teaching   | Severe sepsis + Septic shock          | -       | Early sepsis management provided by a study medical officer                                       | PC     | 671 (426/245) | -                  | 34 (34/34)       | 38 (34.2/44.5)       |
| Jeon 2012 [32]         | historically controlled, single-center    | Korea     | 2007-2009                                | ED, teaching      | Severe sepsis + Septic shock          | -       | Lectures, bedside teaching and simulations for emergency department fellows, residents and nurses | E      | 366 (203/163) | 7 (7/7) [b]        | 62.6 (63/62)     | 14.7 (11.8/18.4)     |
| Jones 2011 [33]        | Prospective before-after, single-center   | USA       | 2004-2005 (pre), 2005-2007 (post)        | ED, teaching      | Severe sepsis + septic shock          | -       | Education and implementation of an early goal-directed protocol                                   | E + PC | 285 (206/79)  | 6.4 (7/5) [b]      | 56.5 (56/58)     | 20.3 (18/27)         |
| Kuan 2013 [34]         | prospective cohort, single-center         | Singapore | 2008 (pre), 2009 (4th period post)       | ED, teaching      | Severe sepsis + Septic shock          | -       | Lectures and training, reminder cards, personal feedback                                          | E      | 117 (-/-)     | 20 (-/-)           | 58 (-/-)         | 26.5 (-/-)           |
| Laguna-Perez 2012 [35] | prospective before-after, single-center   | Spain     | 2008-2010                                | ICU, teaching     | Severe sepsis + Septic shock          | Mixed   | Education and training, posters                                                                   | E      | 125 (41/84)   | 25.8 (24.9/26.3)   | 64.2 (63.3/64.7) | 39.2 (31.7/42.9) [c] |

|                      |                                           |                            |                                      |                   |                              |          |                                                                                                                                                                                                                              |        |                 |                  |                  |                      |
|----------------------|-------------------------------------------|----------------------------|--------------------------------------|-------------------|------------------------------|----------|------------------------------------------------------------------------------------------------------------------------------------------------------------------------------------------------------------------------------|--------|-----------------|------------------|------------------|----------------------|
| LaRosa 2012 [36]     | prospective cohort, single-center         | USA                        | 2009                                 | ICU, teaching     | Severe sepsis + Septic shock | Mixed    | Lectures and bedside teaching, screening tool, Code SMART (Sepsis Management Alert Response System), standardized order sets                                                                                                 | E + PC | 58 (34/24)      | -                | 66.3 (70/61)     | 17.2 (9/29) [d]      |
| Lefrant 2010 [37]    | historically controlled, multi-center     | France                     | 2006                                 | ICU, mixed        | Severe sepsis + Septic shock | -        | Educational program, posters, pocket cards, slide presentations                                                                                                                                                              | E      | 445 (215/230)   | 7.5 (8/7) [b]    | 64.5 (64/65)     | 33.7 (27/40) [c]     |
| Levy 2010 [8]        | time-series analysis, multi-center        | USA, Europe, South America | 2005-2008                            | H, mixed          | Severe sepsis + Septic shock | Mixed    | Educational materials, manual, meetings, cards, posters                                                                                                                                                                      | E      | 3300 (509/2791) | -                | -                | 33.8 (30.8/37)       |
| Levy 2014 [38]       | Time-series analysis, multi-center        | USA, Europe, South America | 2005-2012                            | H, mixed          | Severe sepsis + septic shock | Mixed    | Educational materials, manual, meetings, cards, posters                                                                                                                                                                      | E      | 29470 (-/-)     | -                | -                | 32.8 (25.6/36.6)     |
| MacRedmond 2010 [39] | historically controlled, single-center    | Canada                     | -                                    | ED, teaching      | Severe sepsis + Septic shock | Mixed    | Staff education (screening), sepsis algorithm, computerized physician order entry set, sepsis kit (antibiotics ready available at the ED), invasive hemodynamic monitoring made ready available at 2 high-intensity ED areas | E + PC | 74 (37/37)      | 23.7 (22.6/24.9) | 48.8 (45.1/52.6) | 39.2 (27/51.4)       |
| McKinley 2011 [40]   | prospective before-after, single-center   | USA                        | 2008-2009                            | ICU, teaching     | Severe sepsis + Septic shock | Surgical | Implementation of a computer protocol (open-loop system)                                                                                                                                                                     | PC     | 206 (104/102)   | 27.5 (27/28)     | 58.5 (59/58)     | 19.4 (14/24)         |
| Memon 2012 [41]      | historically controlled, single-center    | Saudi Arabia               | 2008-2011                            | ICU, non-teaching | Severe sepsis + Septic shock | Mixed    | Educational program, evidence based written sepsis pathway, antibiotic recommendations                                                                                                                                       | E + PC | 298 (199/99)    | 21.3 (21.2/21.6) | 66.2 (65/68.6)   | 24.5 (21.1/31.3) [e] |
| Micek 2006 [42]      | prospective before-after, single-center   | USA                        | 2004-2005                            | ED, teaching      | Septic shock                 | -        | Standardized hospital order set, education and training on sepsis                                                                                                                                                            | E + PC | 120 (60/60)     | 22.5 (23.3/21.7) | 64.7 (61.4/68)   | 39.2 (30/48.3) [c]   |
| Miller 2013 [43]     | retrospective cohort, multi-center        | USA                        | 2004 (pre), 2010 (final period post) | ICU, mixed        | Severe sepsis + Septic shock | Mixed    | Large scale education about intent and elements of the bundle                                                                                                                                                                | E      | 1290 (965/325)  | -                | 62.5 (-/-)       | 12.2 (8.7/21.2)      |
| Moore 2009 [44]      | retrospective before-after, single-center | USA                        | 2006 (pre), 2007 (post)              | ICU, teaching     | Severe sepsis + Septic shock | Surgical | Sepsis screening tool                                                                                                                                                                                                        | PC     | 136 (62/74)     | -                | -                | 30.1 (24.2/35.1)     |

|                     |                                           |         |                                      |                   |                                       |         |                                                                                                                                                                   |            |                   |                     |                      |                      |
|---------------------|-------------------------------------------|---------|--------------------------------------|-------------------|---------------------------------------|---------|-------------------------------------------------------------------------------------------------------------------------------------------------------------------|------------|-------------------|---------------------|----------------------|----------------------|
| Na 2012 [45]        | prospective before-after, multi-center    | Asia    | 2008-2009                            | ED, mixed         | Severe sepsis + Septic shock          | -       | Lectures and medical simulations, bedside reminder cards, standardized bundle completion checklist, ICU-team (3 centers)                                          | E + PC     | 183 (55/128)      | 22 (-/-)            | 63 (-/-)             | 29 (36.4/25.8)       |
| Nguyen HB 2007 [46] | prospective before-after, single-center   | USA     | 2003 (pre), 2005 (final period post) | ED, teaching      | Severe sepsis + Septic shock          | -       | Lectures, bedside teaching, sepsis toolkit, pocket cards                                                                                                          | E          | 78 (41/37)        | 32.4 (33.7/30.9)    | 66.4 (63.1/70.1)     | -                    |
| Nguyen HM 2012 [47] | prospective before-after, single-center   | USA     | 2003-2004 (pre), 2005-2006 (post)    | ED, teaching      | Severe sepsis + Septic shock          | -       | Lectures, reminders with SSC guidelines/sepsis bundle recommendations                                                                                             | E          | 96 (62/34)        | 28.6 (29/28)        | 71.2 (74/66)         | 37.5 (27.4/55.9)     |
| Noritomi 2014 [48]  | prospective before-after, multi-center    | Brazil  | 2010 (pre), 2012 (final period post) | H, unclear        | Severe sepsis + Septic shock          | Mixed   | Training program, screening tool (flow-chart), guidelines for antibiotic therapy, laboratory team, posters                                                        | E + PC     | 364 (161/203)     | 18.2 (16/20)        | 63.1 (62/64)         | 42 (25.5/55.2)       |
| Palleschi 2013 [49] | retrospective before-after, multi-center  | USA     | 2011 (pre), 2012 (post)              | ED, teaching      | Sepsis + severe sepsis + septic shock | -       | Lectures, posters, badge extenders with guidelines for sepsis care                                                                                                | E          | 100 (53/47)       | -                   | -                    | -                    |
| Patocka 2014 [50]   | retrospective before-after, single-center | Canada  | 2005 (pre), 2008 (post)              | ED, teaching      | Severe sepsis + Septic shock          | -       | Training, triage screening tool                                                                                                                                   | E + PC     | 355 (170/185)     | -                   | 73.9 (72.4/75.3)     | 18.6 (15.3/21.6)     |
| Plambech 2012 [51]  | prospective before-after, single-center   | Denmark | 2009-2010                            | ED, unclear       | Sepsis + severe sepsis + septic shock | -       | Electronically accessible guidelines, posters with diagnosis and treatment algorithms, pocket cards, checklists, training and support from key nurses and doctors | E + PC     | 75 (48/27)        | -                   | -                    | -                    |
| Sawyer 2011 [52]    | prospective case-control, single-center   | USA     | 2008-2009                            | H, teaching       | Sepsis + severe sepsis + septic shock | Medical | Computerized automatic real-time sepsis alert system                                                                                                              | PC         | 270 (89/181)      | 17.6 (17.7/17.6)    | 52 (50.4/52.6)       | 11.2 (10.1/11.6)     |
| Schramm 2011 [53]   | prospective before-after, single-center   | USA     | (A) 2007 (pre), 2008 (post)          | ICU, teaching     | Severe sepsis + Septic shock          | Medical | (A) Daily auditing and weekly feedback                                                                                                                            | (A) E      | (A) 539 (272/267) | -                   | (A) 67.5 (68.7/66.3) | (A) 28.8 (28.7/30.3) |
|                     |                                           |         | (B) 2007 (pre), 2009 (post)          |                   |                                       |         | (B) Daily auditing and weekly feedback, sepsis team                                                                                                               | (B) E + PC | (B) 690 (423/267) | -                   | (B) 66 (65.8/66.3)   | (B) 24.9 (22/30.3)   |
| Seoane 2013 [54]    | time-series analysis, single-center       | USA     | 2008-2012                            | ICU, non-teaching | Severe sepsis + septic shock          | Medical | Lectures, posters, pocket cards, online modules, order sets, feedback                                                                                             | E + PC     | 1105 (-/-)        | Range 21-25 (23/21) | 63 (-/-)             | -(7.5/22)            |

|                     |                                                |             |                                                       |                   |                                       |          |                                                                                                                                                              |        |                   |                     |                  |                  |
|---------------------|------------------------------------------------|-------------|-------------------------------------------------------|-------------------|---------------------------------------|----------|--------------------------------------------------------------------------------------------------------------------------------------------------------------|--------|-------------------|---------------------|------------------|------------------|
| Shapiro 2006 [55]   | historically controlled, single-center         | USA         | 2000-2001 (pre), 2003-2004 (post)                     | ED, teaching      | Septic shock                          | Medical  | Implementation of a sepsis protocol, training, lectures, cards, nursing flow sheets, computerized order sets                                                 | E + PC | 130 (79/51)       | 24.1 (23.9/24.5)    | 69.6 (68/72)     | 25.3 (20.3/29.4) |
| Shiramizo 2011 [56] | prospective before-after, single-center        | Brazil      | 2005-2006 (pre), 2009 (final period post)             | ICU, non-teaching | Severe sepsis + Septic shock          | Mixed    | Lectures, e-learning, protocols, sepsis team                                                                                                                 | E + PC | 217 (117/100)     | 23 (-/-)            | 66 (-/-)         | 33.6 (16.2/54)   |
| Silverman 2011 [57] | (A) historically controlled, single-center     | USA         | (A) before 2006 (pre), 2006-2008 (post)               | ICU, non-teaching | Severe sepsis + Septic shock          | Surgical | (A) Introduction of a sepsis practice bundle by a sepsis team (education, support, order sets, surveillance)                                                 | E + PC | 205 (186/19)      | -                   | 67.4 (67/72)     | 29.3 (28/42) [d] |
|                     | (B) prospective before-after                   |             | (B) 2006-2008 (pre), after Sept 2008 (post)           |                   |                                       |          | (B) Addition of a surgical intensivist and a surgical ICU care team                                                                                          | PC     | 254 (68/186)      | -                   | 66.2 (64/67)     | 26 (20/28) [d]   |
| Sweet 2010 [58]     | retrospective before-after, single-center      | Canada      | 2004-2005 (pre), 2005-2006 (post)                     | ED, teaching      | Sepsis + severe sepsis + septic shock | -        | Development of a local sepsis protocol by a sepsis working group with preprinted order sets and a triage screening tool; education, posters with flow-charts | E + PC | 59 (30/29)        | 24.4 (22/26.9)      | 58 (52.4/63.5)   | 25.4 (20/31)     |
| Thiel 2009 [59]     | retrospective before-after, single-center      | USA         | 2003-2005 (pre), 2005-2006 (post)                     | H, teaching       | Severe sepsis                         | Mixed    | Hospital order sets based on SSC guidelines, education                                                                                                       | E + PC | 400 (200/200)     | 21 (20.2/21.8)      | 59.5 (60.5/58.5) | 47.3 (39.5/55)   |
| Tromp 2010 [60]     | prospective before-after, single-center        | Netherlands | (A) Jul 2006-Nov 2006 (pre), Nov 2006-Jun 2007 (post) | ED, teaching      | Sepsis + severe sepsis + septic shock | -        | (A) Development of a nurse-driven care bundle based sepsis protocol with screening and performance lists for nurses/physicians                               | (A) PC | (A) 606 (447/159) | -                   | (A) 59 (60/55)   | (A) 6.1 (6/6.3)  |
|                     |                                                |             | (B) Nov 2006-Jun 2007 (pre), Jun-Oct 2007 (post)      |                   |                                       |          | (B) Training on sepsis and performance feedback                                                                                                              | (B) E  | (B) 666 (219/447) | -                   | (B) 59.7 (59/60) | (B) 5.8 (5.5/6)  |
| Vallée 2007 [61]    | historically controlled, single-center         | France      | 2005                                                  | ICU, teaching     | Septic shock                          | -        | Pentaxial target diagram (visual tool for hemodynamic parameters)                                                                                            | PC     | 80 (38/42)        | 62 (59.9/63.8) [ff] | 61 (63.7/58.4)   | 56.2 (52/59) [c] |
| Van Zanten 2014 [6] | Prospective time-series analysis, multi-center | Netherlands | 2009-2013                                             | ICU, mixed        | Severe sepsis + Septic shock          | Mixed    | Educational materials, training, meetings, feedback                                                                                                          | E      | 8387 (-/-)        | 83 (-/-) [g]        | 66.7 (-/-)       | - (25.3/31.1)    |

|                       |                                               |        |                                                            |                     |                                                   |       |                                                     |    |               |                  |                  |                  |
|-----------------------|-----------------------------------------------|--------|------------------------------------------------------------|---------------------|---------------------------------------------------|-------|-----------------------------------------------------|----|---------------|------------------|------------------|------------------|
| Wang 2013<br>[62]     | prospective<br>before-after,<br>single-center | China  | 2008 (pre),<br>2009 (post)                                 | ED, teaching        | Severe<br>sepsis +<br>Septic<br>shock             | -     | Flow-chart, treatment<br>algorithms, screening tool | PC | 195 (117/78)  | 19.6 (19.5/19.7) | 68.3 (69.9/65.9) | 36.9 (31.6/44.8) |
| Westphal 2011<br>[63] | prospective<br>before-after,<br>multi-center  | Brazil | Aug 2005-Oct<br>2006 (pre),<br>Nov 2006-Nov<br>2007 (post) | H, non-<br>teaching | Sepsis +<br>severe<br>sepsis +<br>septic<br>shock | Mixed | Screening protocol                                  | PC | 217 (115/102) | 21 (21/22)       | 55.3 (55.4/55.2) | 48.4 (36.5/61.7) |

Illness severity is expressed as APACHE II score unless otherwise indicated. *ED* emergency department; *H* hospital; *ICU* intensive care unit; *E* education; *PC* process change; *[a]* 30-day mortality; *[b]* SOFA score; *[c]* 28-day mortality; *[d]* ICU-mortality; *[e]* 30-day hospital mortality; *[f]* SAPS; *[g]* APACHE IV
