# Supplementary material for: Effect of Performance Improvement Programs on Compliance with Sepsis Bundles and Mortality: A Systematic Review and Meta-Analysis of Observational Studies
Source: PubMed Central journal article supplement (PMC4422717; doi:10.1371/journal.pone.0125827), 2015-05-06
Supplement: pone.0125827.s008.pdf [file pone.0125827.s008.pdf]

### S3 Table

Outcomes measured in the analyzed studies.

| Study                           | Compliance    |                |                    |                   |             |                        |                |                |                 |              |                 |              |             |          |                    |     | Mortality |
|---------------------------------|---------------|----------------|--------------------|-------------------|-------------|------------------------|----------------|----------------|-----------------|--------------|-----------------|--------------|-------------|----------|--------------------|-----|-----------|
|                                 | 6h-<br>bundle | 24h-<br>bundle | Measure<br>lactate | Blood<br>cultures | Antibiotics | Fluid<br>resuscitation | Measure<br>CVP | CVP >8<br>mmHg | Measure<br>SvO2 | SvO2<br>>70% | MAP >65<br>mmHg | Vasopressors | Ventilation | Steroids | Glucose<br>control | APC |           |
| Berg 2013 [10]                  | *             | *              | *                  | *                 | *           |                        | *              | *              | *               | *            | *               |              | *           | *        | *                  | *   | *         |
| Bond 2013 [18]                  |               |                | *                  | *                 | *           | *                      | *              | *              |                 |              |                 | *            |             | *        |                    |     | *         |
| Cannon 2012 [19]                |               |                |                    |                   |             |                        |                |                |                 |              |                 |              |             |          |                    |     | *         |
| Capuzzo 2012 [20]               |               |                |                    |                   |             |                        |                |                |                 |              |                 |              |             |          |                    |     | *         |
| Castellanos-Ortega 2010<br>[21] | *             | *              | *                  | *                 | *           | *                      |                | *              |                 | *            | *               |              | *           | *        | *                  | *   | *         |
| Chen 2013 [22]                  |               |                | *                  | *                 | *           |                        | *              |                |                 |              |                 |              |             | *        |                    | *   | *         |
| De Miguel-Yanes 2009<br>[23]    | *             |                | *                  | *                 | *           |                        |                |                |                 |              |                 |              |             |          |                    |     | *         |
| El Solh 2008 [24]               |               |                | *                  |                   | *           |                        |                |                |                 |              |                 |              |             | *        | *                  | *   | *         |
| Ferrer 2008 [25]                | *             | *              | *                  | *                 | *           |                        |                | *              |                 | *            |                 |              | *           | *        | *                  | *   | *         |
| Francis 2010 [26]               |               |                |                    |                   | *           |                        |                |                |                 |              |                 |              |             |          |                    |     | *         |
| Girardis 2009 [27]              | *             | *              |                    | *                 | *           | *                      |                |                |                 | *            |                 |              | *           | *        | *                  | *   | *         |
| Giuliano 2011 [9]               | *             | *              |                    |                   |             |                        |                |                |                 |              |                 |              |             |          |                    |     | *         |
| Gurnani 2010 [28]               |               |                |                    |                   |             | *                      |                |                |                 |              |                 |              |             |          |                    |     | *         |
| Heppner 2012 [29]               |               |                | *                  | *                 | *           | *                      |                | *              |                 |              |                 |              |             |          |                    |     | *         |
| Hoo 2009 [30]                   |               |                |                    |                   |             |                        |                |                |                 |              |                 |              |             |          |                    |     | *         |
| Jacob 2012 [31]                 |               |                |                    |                   | *           | *                      |                |                |                 |              |                 |              |             |          |                    |     | *         |
| Jeon 2012 [32]                  | *             |                |                    |                   | *           | *                      | *              | *              | *               | *            | *               | *            | *           |          |                    |     | *         |
| Jones 2011 [33]                 |               |                |                    |                   |             |                        |                |                |                 |              |                 | *            |             |          |                    | *   | *         |
| Kuan 2013 [34]                  | *             |                | *                  | *                 | *           | *                      |                | *              |                 | *            | *               |              |             |          |                    |     | *         |
| Laguna-Perez 2012 [35]          |               |                | *                  | *                 | *           | *                      |                | *              |                 | *            | *               |              | *           | *        | *                  | *   | *         |
| LaRosa 2012 [36]                |               |                | *                  | *                 | *           | *                      | *              | *              | *               | *            |                 |              |             |          | *                  | *   | *         |
| Lefrant 2010 [37]               |               |                | *                  | *                 | *           | *                      | *              | *              | *               | *            | *               |              |             | *        | *                  | *   | *         |
| Levy 2010 [8]                   | *             | *              | *                  | *                 | *           | *                      |                | *              |                 | *            |                 |              | *           | *        | *                  | *   | *         |
| Levy 2014 [38]                  | *             | *              |                    |                   |             |                        |                |                |                 |              |                 |              |             |          |                    |     | *         |
| MacRedmond 2010 [39]            | *             |                | *                  |                   |             |                        |                |                |                 |              |                 |              |             |          |                    |     | *         |
| McKinley 2011 [40]              | *             |                | *                  | *                 | *           | *                      |                | *              |                 |              |                 |              |             |          |                    |     | *         |
| Memon 2012 [41]                 | *             |                | *                  | *                 | *           | *                      |                | *              |                 | *            | *               |              |             |          |                    |     | *         |

|                     |   |   |   |   |   |   |   |   |   |   |   |   |   |   |
|---------------------|---|---|---|---|---|---|---|---|---|---|---|---|---|---|
| Micek 2006 [42]     |   | * | * | * | * |   | * | * |   | * | * |   | * | * |
| Miller 2013 [43]    |   |   |   |   |   |   |   |   |   |   |   |   |   | * |
| Moore 2009 [44]     |   |   |   |   |   |   |   |   |   |   |   |   |   | * |
| Na 2012 [45]        | * | * | * | * | * |   | * |   | * | * |   |   |   | * |
| Nguyen HB 2007 [46] | * | * |   | * | * |   |   |   |   |   |   | * |   |   |
| Nguyen HM 2012 [47] |   | * | * | * | * |   |   |   |   |   |   | * | * | * |
| Noritomi 2014 [48]  | * | * | * | * |   |   | * |   | * |   |   |   |   | * |
| Palleschi 2013 [49] |   | * | * |   |   |   |   |   |   |   |   |   |   |   |
| Patocka 2014 [50]   |   | * |   | * |   |   |   |   |   |   |   |   |   | * |
| Plambech 2012 [51]  | * | * | * | * | * |   |   |   |   |   |   |   |   |   |
| Sawyer 2011 [52]    |   |   |   | * | * |   |   |   |   |   |   |   |   | * |
| Schramm 2011 [53]   | * | * | * | * | * |   |   |   |   | * |   |   |   | * |
| Seoane 2013 [54]    | * | * |   |   |   |   |   |   |   |   |   |   |   | * |
| Shapiro 2006 [55]   |   |   |   | * |   |   |   |   |   | * |   | * |   | * |
| Shiramizo 2011 [56] | * | * | * | * | * |   | * |   | * |   | * | * | * | * |
| Silverman 2011 [57] |   |   |   |   |   |   |   |   |   |   |   |   |   | * |
| Sweet 2010 [58]     |   |   |   |   |   |   |   |   |   | * |   | * | * | * |
| Thiel 2009 [59]     |   |   |   |   |   |   | * |   | * |   | * |   |   | * |
| Tromp 2010 [60]     | * | * | * | * |   |   |   |   |   |   |   |   |   | * |
| Vallée 2007 [61]    |   |   |   |   |   |   |   |   |   |   |   |   |   | * |
| Van Zanten 2014 [6] | * | * | * | * | * | * | * |   |   | * | * | * | * | * |
| Wang 2013 [62]      | * | * | * | * | * | * | * |   | * |   | * | * | * | * |
| Westphal 2011 [63]  | * | * |   |   |   |   |   |   |   |   |   |   |   | * |

\*outcome measured; *CVP* central venous pressure; *APC* activated Protein C (Drotrecogin alfa activated)
