# Supplementary material for: Effect of Performance Improvement Programs on Compliance with Sepsis Bundles and Mortality: A Systematic Review and Meta-Analysis of Observational Studies
Source: PubMed Central journal article supplement (PMC4422717; doi:10.1371/journal.pone.0125827), 2015-05-06
Supplement: pone.0125827.s009.pdf [file pone.0125827.s009.pdf]

## S4 Table

Risk of bias and study quality assessment.

| Study                        | Control for confounders |          | Newcastle-Ottawa Scale (cohort)          |                                 |                           |                                                     |                                                       |                                       |                       |                       |                           |                 |
|------------------------------|-------------------------|----------|------------------------------------------|---------------------------------|---------------------------|-----------------------------------------------------|-------------------------------------------------------|---------------------------------------|-----------------------|-----------------------|---------------------------|-----------------|
|                              | Severity of illness     | Age      | Representativeness of the exposed cohort | Selection of non-exposed cohort | Ascertainment of exposure | Demonstration that outcome was not present at start | Comparability of the two cohorts: severity of illness | Comparability of the two cohorts: age | Assessment of outcome | Follow-up long enough | Completeness of follow-up | Total NOS score |
| Berg 2013 [10]               | no                      | no       | *                                        | *                               | *                         | *                                                   |                                                       |                                       | *                     | *                     | *                         | 7               |
| Cannon 2012 [19]             | no                      | no       | *                                        | *                               | *                         | *                                                   |                                                       |                                       | *                     | *                     | *                         | 7               |
| Capuzzo 2012 [20]            | no                      | adj (RR) | *                                        | *                               | *                         | *                                                   |                                                       | *                                     | *                     | *                     |                           | 7               |
| Castellanos-Ortega 2010 [21] | adj                     | adj      | *                                        | *                               | *                         | *                                                   | *                                                     | *                                     | *                     | *                     | *                         | 9               |
| Chen 2013 [22]               | no                      | no       | *                                        | *                               | *                         | *                                                   |                                                       |                                       | *                     | *                     |                           | 6               |
| De Miguel-Yanes 2009 [23]    | no                      | no       | *                                        | *                               | *                         | *                                                   |                                                       |                                       | *                     | *                     |                           | 6               |
| El Solh 2008 [24]            | bal                     | bal      |                                          | *                               | *                         | *                                                   | *                                                     | *                                     | *                     | *                     |                           | 7               |
| Ferrer 2008 [25]             | bal, adj                | bal, adj | *                                        | *                               | *                         | *                                                   | *                                                     | *                                     | *                     | *                     | *                         | 9               |
| Francis 2010 [26]            | no                      | bal      | *                                        | *                               | *                         | *                                                   |                                                       | *                                     | *                     | *                     |                           | 7               |
| Girardis 2009 [27]           | no                      | bal      | *                                        | *                               |                           | *                                                   |                                                       | *                                     | *                     | *                     | *                         | 7               |
| Giuliano 2011 [9]            | bal                     | bal      | *                                        | *                               | *                         | *                                                   | *                                                     | *                                     | *                     | *                     | *                         | 9               |
| Gurnani 2010 [28]            | bal                     | no       | *                                        | *                               | *                         | *                                                   | *                                                     |                                       | *                     | *                     |                           | 7               |
| Heppner 2012 [29]            | no                      | bal      |                                          | *                               | *                         | *                                                   |                                                       | *                                     | *                     | *                     |                           | 6               |
| Hoo 2009 [30]                | no                      | no       |                                          |                                 | *                         | *                                                   |                                                       |                                       | *                     |                       |                           | 3               |
| Jacob 2012 [31]              | no                      | adj (HR) |                                          | *                               | *                         | *                                                   |                                                       | *                                     | *                     | *                     | *                         | 7               |
| Jeon 2012 [32]               | bal                     | bal      | *                                        | *                               | *                         | *                                                   | *                                                     | *                                     | *                     | *                     | *                         | 9               |
| Jones 2011                   | no                      | bal      | *                                        | *                               | *                         | *                                                   |                                                       | *                                     | *                     | *                     |                           | 7               |

[33]

|                           |          |     |   |   |   |   |   |   |   |   |   |   |   |
|---------------------------|----------|-----|---|---|---|---|---|---|---|---|---|---|---|
| Kuan 2013<br>[34]         | no       | no  | * | * | * | * |   |   | * | * |   |   | 6 |
| Laguna-Perez<br>2012 [35] | bal      | bal | * | * | * | * | * | * | * | * | * |   | 7 |
| LaRosa 2012<br>[36]       | no       | adj | * | * |   | * |   | * | * |   | * |   | 6 |
| Lefrant 2010<br>[37]      | adj (HR) | bal | * | * | * | * | * | * | * | * | * |   | 8 |
| Levy 2010 [8]             | no       | no  | * | * |   | * |   |   | * | * |   |   | 5 |
| Levy 2014 [38]            | no       | no  | * | * |   | * |   |   | * | * |   |   | 5 |
| MacRedmond<br>2010 [39]   | adj      | no  | * | * | * | * | * |   | * | * |   |   | 7 |
| McKinley 2011<br>[40]     | bal      | bal |   | * | * | * | * | * | * | * | * |   | 7 |
| Memon 2012<br>[41]        | bal      | bal | * | * | * | * | * | * | * | * | * | * | 9 |
| Micek 2006<br>[42]        | adj      | adj | * | * | * | * | * | * | * | * | * | * | 9 |
| Miller 2013<br>[43]       | no       | no  | * | * | * | * |   |   | * | * |   |   | 6 |
| Moore 2009<br>[44]        | no       | no  | * | * | * | * |   |   | * |   |   |   | 5 |
| Na 2012 [45]              | no       | no  | * | * |   | * |   |   | * | * |   |   | 5 |
| Nguyen HB<br>2007 [46]    | no       | no  | * | * | * | * |   |   | * | * |   |   | 6 |
| Nguyen HM<br>2012 [47]    | bal      | no  | * | * | * | * | * |   | * | * |   |   | 7 |
| Noritomi 2014<br>[48]     | no       | bal | * | * | * | * |   | * | * | * |   |   | 7 |
| Palleschi 2013<br>[49]    | no       | no  | * | * | * | * |   |   | * | * |   |   | 6 |
| Patocka 2014<br>[50]      | no       | bal | * | * | * | * |   | * | * | * |   |   | 7 |
| Plambech<br>2012 [51]     | no       | no  | * | * | * | * |   |   | * | * |   |   | 6 |
| Schramm (A)<br>2011 [53]  | adj      | no  |   | * | * | * | * |   | * | * | * |   | 7 |
| Schramm (B)<br>2011 [53]  | adj      | no  |   | * | * | * | * |   | * | * | * |   | 7 |
| Seoane 2013<br>[54]       | no       | no  |   |   | * | * |   |   | * | * |   |   | 4 |

|                         |     |     |   |   |   |   |   |   |   |   |   |   |
|-------------------------|-----|-----|---|---|---|---|---|---|---|---|---|---|
| Shapiro 2006 [55]       | bal | bal | * | * | * | * | * | * | * | * | * | 8 |
| Shiramizo 2011 [56]     | no  | no  | * | * | * | * |   | * | * |   |   | 6 |
| Silverman (A) 2011 [57] | no  | no  |   |   | * | * |   |   | * |   |   | 3 |
| Silverman (B) 2011 [57] | no  | no  |   | * | * | * |   |   | * |   |   | 4 |
| Sweet 2010 [58]         | no  | no  | * | * | * | * |   |   | * | * |   | 6 |
| Thiel 2009 [59]         | adj | adj | * | * | * | * | * | * | * | * |   | 8 |
| Tromp (A) 2010 [60]     | no  | no  | * | * | * | * |   |   | * | * |   | 6 |
| Tromp (B) 2010 [60]     | no  | no  | * | * | * | * |   |   | * | * |   | 6 |
| Vallée 2007 [61]        | bal | bal |   | * | * | * | * | * | * | * | * | 8 |
| Van Zanten 2014 [6]     | adj | adj | * | * | * | * | * | * | * | * | * | 9 |
| Wang 2013 [62]          | bal | bal | * | * | * | * | * | * | * | * |   | 8 |
| Westphal 2011 [63]      | adj | bal | * | * | * | * | * | * | * | * |   | 8 |

Newcastle-Ottawa Scale (case-control)

|                  |     |       | Case definition | Representativeness of cases | Selection of controls | Definition of controls | Comparability: severity of illness | Comparability: age | Ascertainment of exposure | Same method for ascertainment | Non-response (exclusions for missing data) | Total NOS score |
|------------------|-----|-------|-----------------|-----------------------------|-----------------------|------------------------|------------------------------------|--------------------|---------------------------|-------------------------------|--------------------------------------------|-----------------|
| Bond 2013 [18]   | no  | match | *               |                             |                       | *                      |                                    | *                  | *                         | *                             | *                                          | 6               |
| Sawyer 2011 [52] | bal | bal   | *               | *                           |                       | *                      | *                                  | *                  | *                         | *                             |                                            | 7               |

\*Item fulfilled. The adjusted effect estimate calculated by the authors was odds ratio unless otherwise indicated in parentheses.

*adj* adjusted; *bal* balance; *match* matching; *RR* relative risk; *HR* hazard ratio.
